# Supplementary material
Source: PubMed Central journal article supplement (PMC2947100)
Supplement: ejhg2008249x1.pdf [file ejhg2008249x1.pdf]

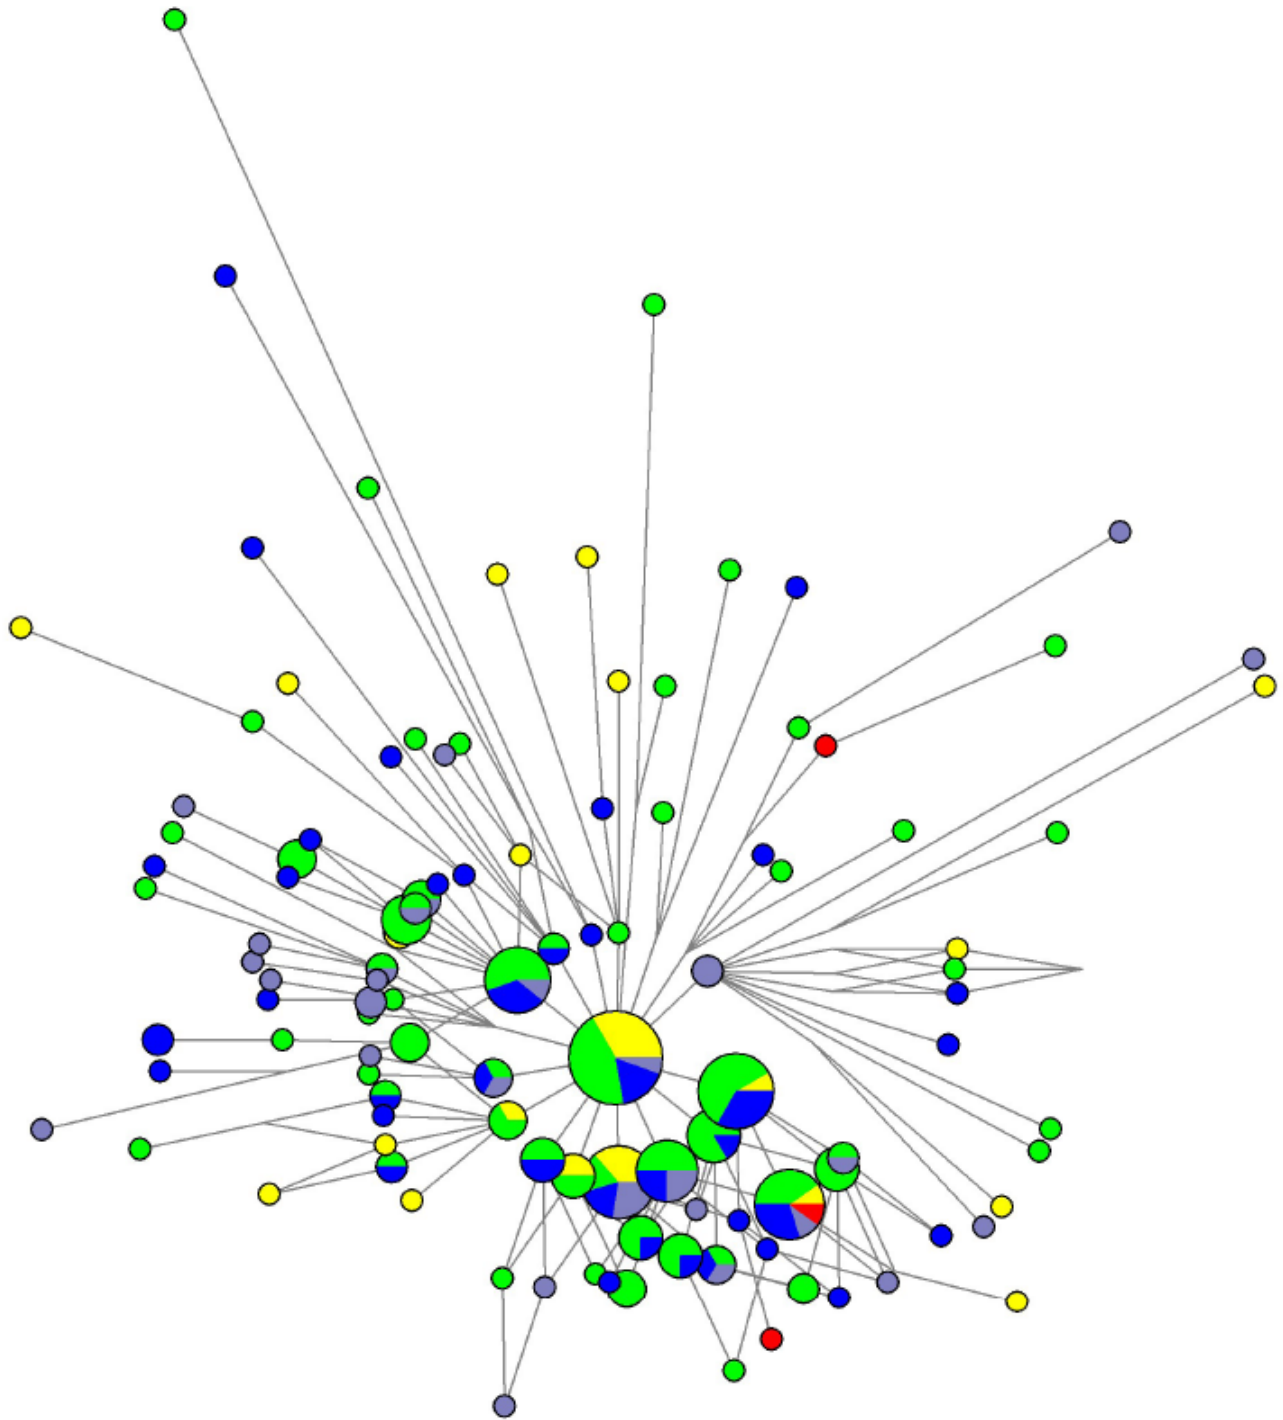

**Figure S1.** Network of the STR haplotypes belonging to haplogroup I-M423.

The network was obtained by the analysis of 219 I-M423 Balkan samples (Table S2) examined for all the analyzed STR loci and three Turkish samples from Konya (N=117) included in Rootsi *et al.*<sup>28</sup> The represented geographic areas are indicated by colour: Greeks; Macedonian-Greeks and Albanians in yellow; Croats and Slovenians in blue; Bosnian groups in green; Hungarians, Poles, Ukrainians in violet; Turks in red. Circles represent the microsatellite haplotypes. Circle and sector areas are proportional to the haplotype frequency in the haplogroup and in the geographic area indicated by colour, respectively. The smallest circle of the network corresponds to one Y chromosome.
