# Supplementary material
Source: PubMed Central journal article supplement (PMC2947100)
Supplement: ejhg2008249x2.pdf [file ejhg2008249x2.pdf]

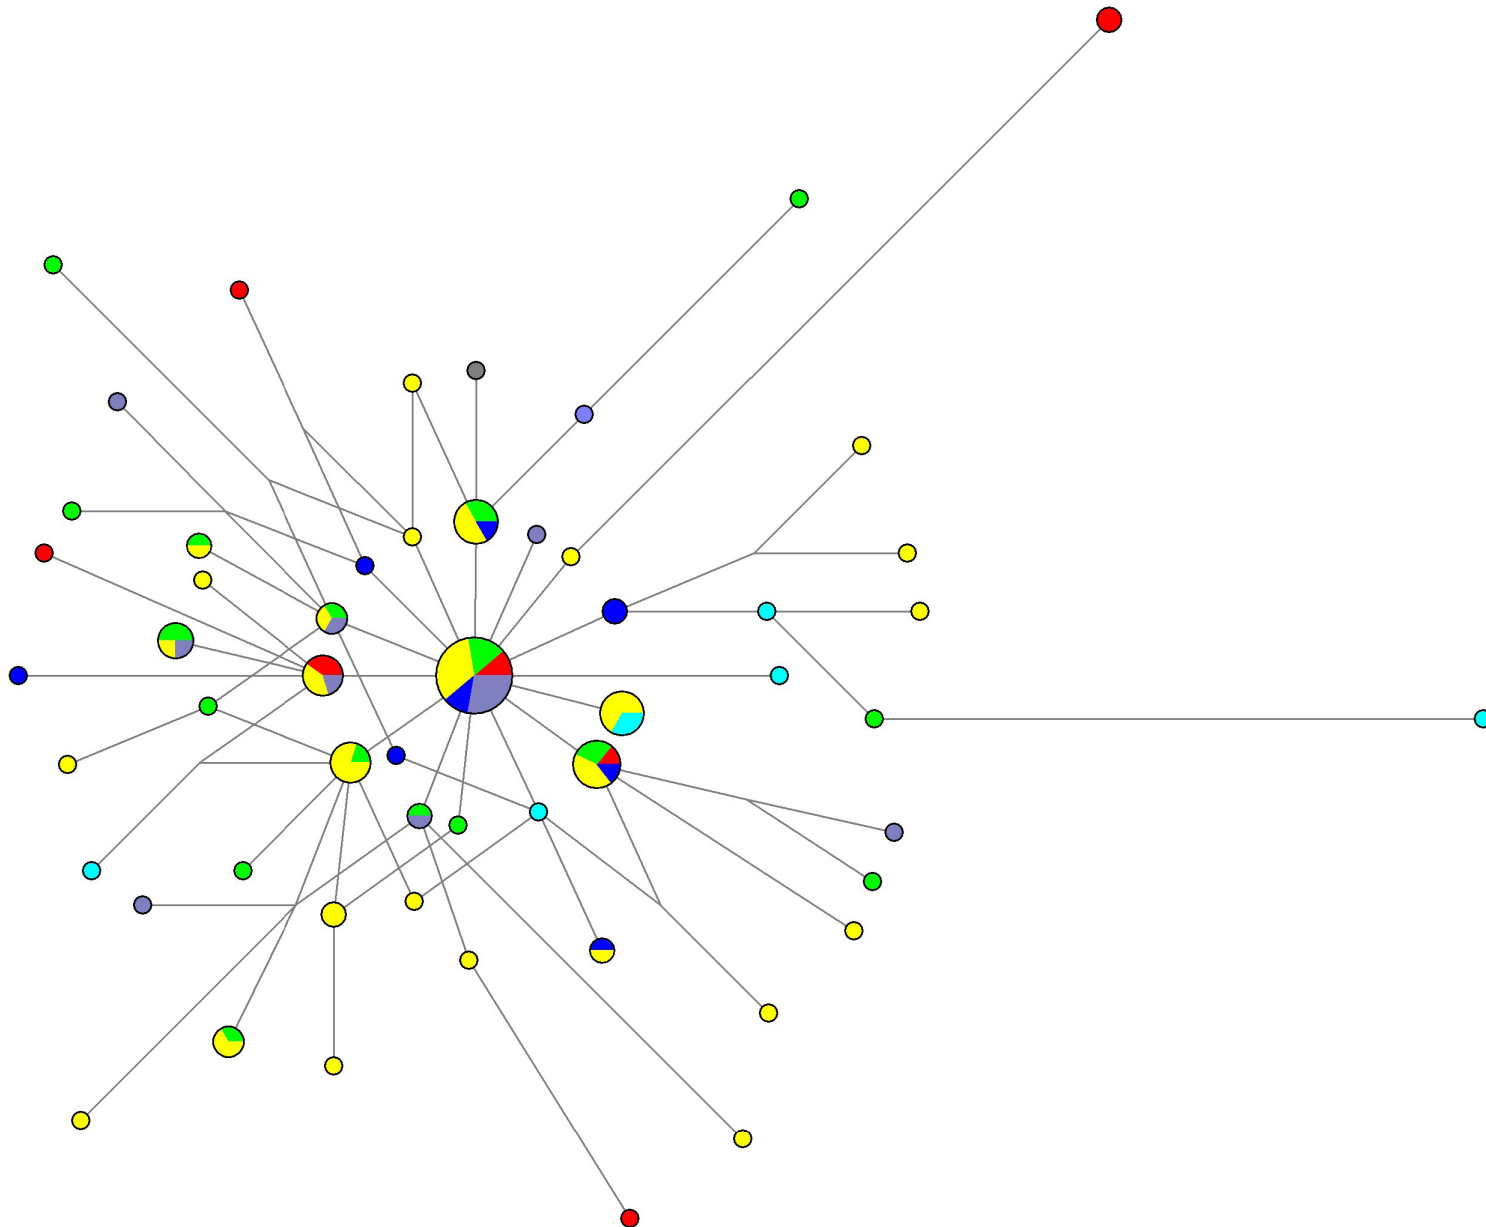

**Figure S2.** Network of the STR haplotypes belonging to haplogroup E-V13.

The network was obtained by the analysis of 109 E-V13 chromosomes [92 from the Balkans, 10 Turks from Konya (N=117) and 7 South Italians from Calabria (N=80) included in Semino et al.33]. The represented geographic areas are indicated by colour: Greeks, Macedonian-Greeks and Albanians in yellow; Croats and Slovenians in blue; Bosnian groups in green; Hungarians, Poles and Ukrainians in violet; Turks in red; Caucasians in grey; Italians in light blue. Circles represent the microsatellite haplotypes. Circle and sector areas are proportional to the haplotype frequency in the haplogroup and in the geographic area indicated by colour, respectively. The smallest circle of the network corresponds to one Y chromosome.
