# Supplementary material
Source: PubMed Central journal article supplement (PMC2947100)
Supplement: ejhg2008249x3.pdf [file ejhg2008249x3.pdf]

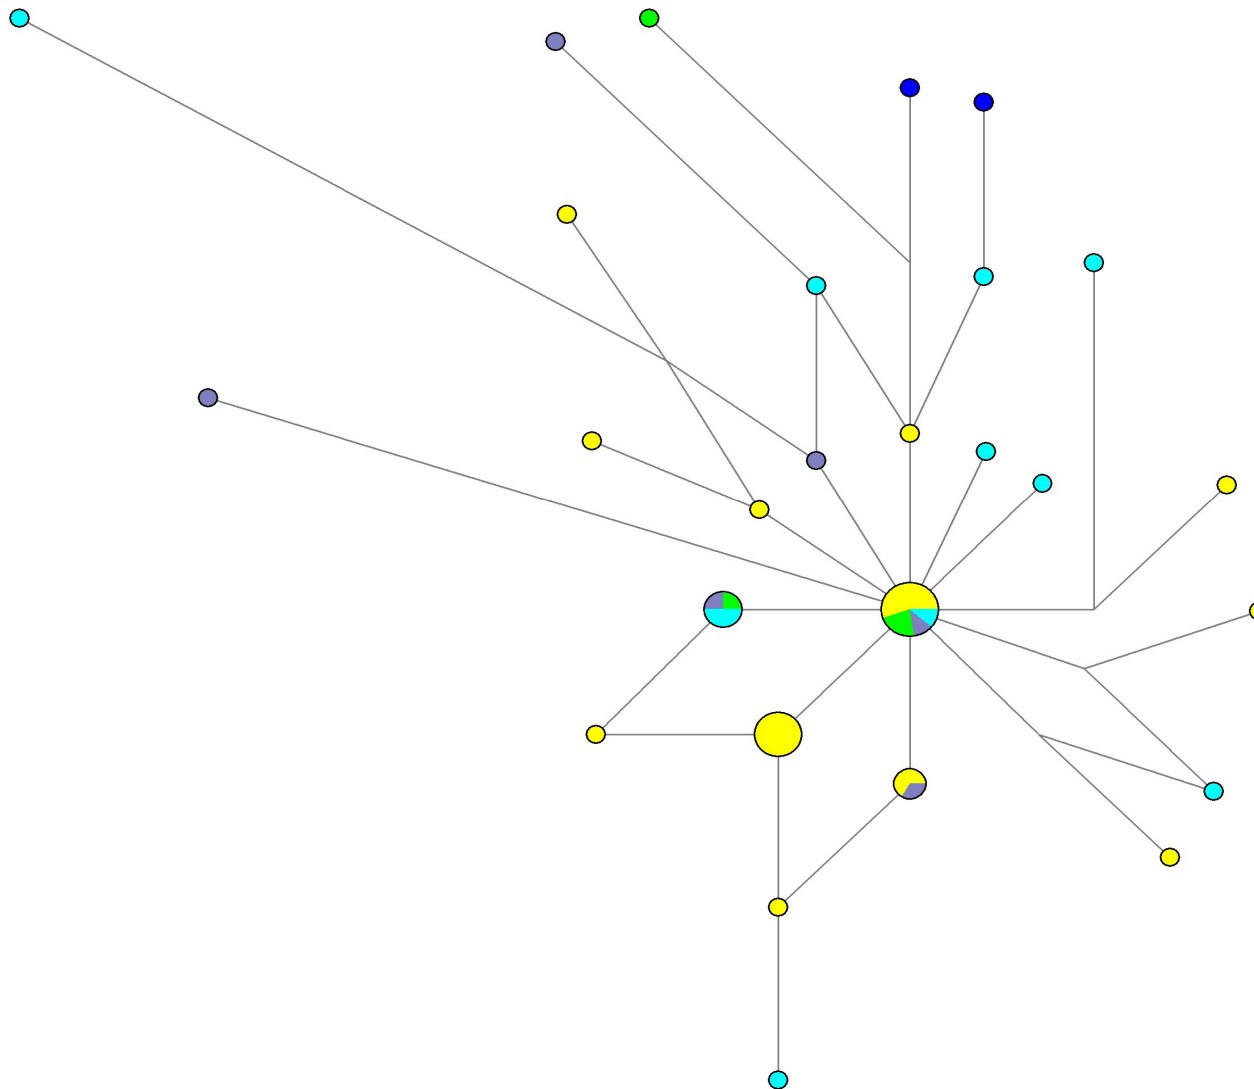

**Figure S3.** Network of the STR haplotypes belonging to haplogroup J-M241.

The network was obtained by the analysis of all 34 Balkan samples and 11 Italian subjects [4 Apulians (N=92), 2 Sardinians (N=144) reported in Semino *et al.*33 and 5 Tuscans (N=116)]. The represented geographic areas are indicated by colour: Greeks, Macedonian-Greeks and Albanians in yellow; Croats in blue; Bosnian groups in green; Czechs, Poles and Ukrainians in violet; Italians in light blue. Circles represent the microsatellite haplotypes. Circle and sector areas are proportional to the haplotype frequency in the haplogroup and in the geographic area indicated by colour, respectively. The smallest circle of the network corresponds to one Y chromosome.
